1 **Rbf/E2F1 control growth and endoreplication via steroid-independent**

2 **Ecdysone Receptor signalling in *Drosophila* prostate-like secondary cells**

3

4 Aashika Sekar<sup>a</sup>, Aaron Leiblich<sup>a,b</sup>, Josephine E.E.U. Hellberg<sup>a</sup>, Dhruv Sarma<sup>a</sup>, Cláudia C.

5 Mendes<sup>a</sup>, S. Mark Wainwright<sup>a</sup>, Carina Gandy<sup>a</sup>, Deborah C.I. Goberdhan<sup>a</sup>, Freddie C. Hamdy<sup>b</sup>,

6 Clive Wilson<sup>a</sup>

7

8 <sup>a</sup> Department of Physiology, Anatomy and Genetics, University of Oxford, South Parks Road,

9 Oxford, United Kingdom

10 <sup>b</sup> Nuffield Department of Surgical Sciences, University of Oxford, Oxford, United Kingdom

11

12 Corresponding author: [clive.wilson@dpag.ox.ac.uk](mailto:clive.wilson@dpag.ox.ac.uk)

13

14

15

16

17

18

19

20

21

22

23

24

## 25 **Abstract**

26 Dysregulation of cell cycle components results in the development and progression of several  
27 cancer types. Unusually, loss of the tumour suppressor gene, *Retinoblastoma* (Rb), and  
28 consequent activation of transcription factor E2F1 have been linked to late-stage tumour  
29 progression in prostate cancer, rather than early-stage events. This change is associated with  
30 an androgen-independent form of cancer, castration-resistant prostate cancer (CRPC), which  
31 frequently still requires androgen receptor (AR) signalling. We have previously shown that  
32 binucleate secondary cells (SCs) of the *Drosophila melanogaster* male accessory gland (AG)  
33 share several functional and signalling similarities with human prostate epithelial cells. Upon  
34 mating, SC growth regulation switches from a steroid-dependent to a steroid-independent form  
35 of Ecdysone Receptor (EcR) control that induces genome endoreplication. Here, we  
36 demonstrate that the *Drosophila* Rb homologue, Rbf, and E2F1, as well as cell cycle regulators,  
37 Cyclin D (CycD) and Cyclin E (CycE), are key mediators of SC growth and endoreplication  
38 both in virgin and mated males. Importantly, we show that the CycD/Rbf/E2F1 axis requires  
39 the EcR, but not ecdysone, to trigger CycE-dependent endoreplication and associated growth  
40 in SCs after mating, mirroring changes in CRPC. We also demonstrate that excess Rbf activity  
41 reversibly suppresses binucleation in adult SCs. Overall, our work reveals mechanistic parallels  
42 between the physiological switch to hormone-independent EcR signalling in SCs, and the  
43 pathological switch seen in CRPC, and suggests that the latter may represent the dysregulation  
44 of a currently unidentified physiological process, which permits AR signalling when androgen  
45 levels are low.

46

47

48

## 49 **Introduction**

50 During the early stages of prostate cancer, tumour growth requires the androgenic steroids and  
51 the androgen receptor (AR). Although androgen-deprivation therapy (ADT), a mainstay  
52 treatment for advanced prostate cancer, has an initial response rate of 90%, within two years,  
53 most cases progress to an aggressive and incurable form of prostate cancer, castration-resistant  
54 prostate cancer (CRPC) (Zong & Goldstein, 2013). Several processes play a role in the  
55 development of CRPC and in most cases, AR signalling activated in an androgen-independent  
56 manner remains essential for the maintenance and progression of the tumour (Zong &  
57 Goldstein, 2013). The molecular basis of this AR-controlled growth can involve *AR* gene  
58 amplification or increased expression, AR mutations, AR signalling pathway changes, or AR  
59 cofactors leading to androgen hypersensitivity or constitutive AR activity (Altintas et al., 2012;  
60 Zong & Goldstein, 2013).

61  
62 Loss of the tumour suppressor gene *Retinoblastoma* (*Rb*) is commonly observed in several  
63 cancer types and is often considered essential for the early development of cancer (Burkhart &  
64 Sage, 2008; Sharma et al., 2010). However, in prostate cancer, *Rb* loss is associated with late-  
65 stage prostate cancer progression (Sharma et al., 2010). The role of *Rb* in the context of cell  
66 cycle regulation has been extensively studied (Giacinti & Giordano, 2006; Harbour & Dean,  
67 2000a). *Rb* negatively regulates proteins in the E2F transcription factor family, which are  
68 involved in activating genes that are essential for the progression of the Synthesis (S)-phase of  
69 the cell cycle, including CyclinE (*CycE*) (Giacinti & Giordano, 2006; Harbour & Dean,  
70 2000b). During Gap1 (G1)-phase, *Rb* is gradually phosphorylated, first by the growth factor-  
71 stimulated Cyclin D (*CycD*)/cyclin dependent kinase (cdk) 4/6 complex and then by  
72 *CycE*/cdk2 in late G1. It remains hyperphosphorylated until the Mitotic (M)-phase.

73 Hyperphosphorylation of Rb changes its conformation and releases E2F factors, thereby  
74 enabling E2F-dependent transcriptional activity (Giacinti & Giordano, 2006).

75

76 In early prostate cancer, Rb tightly regulates E2F1, which in addition to CycE, also controls  
77 the expression levels of AR, therefore linking Rb/E2F and AR signalling. Loss of *Rb* during  
78 cancer progression leads to an unsupervised activation of E2F, thereby increasing the protein  
79 levels of AR (Sharma et al., 2010). This promotes prostate cancer cellular growth and  
80 proliferation, even after ADT, at least partly explaining the link between loss of *Rb* and CRPC  
81 (Sharma et al., 2010; Thangavel et al., 2017).

82

83 The secretory, paired male accessory gland (AG) of the fruit fly *Drosophila melanogaster*  
84 shares several functional similarities with the prostate and the seminal vesicles, the mammalian  
85 accessory glands (Leiblich et al., 2019; Ravi Ram & Wolfner, 2009; Redhai et al., 2016; Wigby  
86 et al., 2020; Wilson, Leiblich, Goberdhan, & Hamdy, 2017). The AG is formed from a  
87 monolayer epithelium consisting of two distinct octoploid binucleate cell-types: main cells  
88 (MCs) (~1000 cells/AG lobe) and secondary cells (SCs) (~40 cells/AG lobe) (Taniguchi et al.,  
89 2012). The prostate gland and the SCs, unlike the MCs, increase in size as adults age (Leiblich  
90 et al., 2012). Upon mating, the SCs grow further, partly as a result of genome endoreplication  
91 in 25% of SCs, which increases their secretory activity and therefore enhances replenishment  
92 of the AG luminal contents (Leiblich et al., 2019). The BMP pathway and the fly steroid  
93 receptor, the Ecdysone Receptor (EcR), play an essential role in regulating SC growth and  
94 endoreplication. In virgin males, the ecdysone hormone is required for growth. In mated males,  
95 however, SC growth mediated by endoreplication is ecdysone-independent (Leiblich et al.,  
96 2019), unexpectedly mirroring the transition to castration-resistant prostate cancer.

97 Furthermore, BMP signalling, which is also implicated in CRPC, elevates EcR protein levels  
98 and promotes endoreplication in SCs (Lee et al., 2013; Leiblich et al., 2019).

99

100 Since endoreplicating cells utilise a variant of the cell cycle machinery to drive DNA  
101 replication (Edgar & Orr-Weaver, 2001; Zielke, Edgar, & DePamphilis, 2013), we investigated  
102 the molecular mechanisms controlling ecdysone-independent, EcR-mediated endoreplication  
103 in SCs. Here we demonstrate that CycD, Rbf and E2F1 are essential for SC endoreplication  
104 and growth after mating, with Rbf playing an additional role in controlling binucleation.  
105 Although CycE appears to function downstream of EcR, CycD/Rbf/E2F1 require EcR to  
106 control endoreplication; increased E2F1 expression elevates EcR protein levels and in turn,  
107 EcR promotes hormone-independent activation of CycE-mediated endoreplication. Our data  
108 therefore reveal a physiological mechanism involving Rbf/E2F1-activated control of hormone-  
109 independent EcR-mediated endoreplication and growth, which mirrors pathological growth-  
110 promoting changes in AR signalling associated with Rb loss in CRPC.

111

## 112 **Results**

### 113 **EcR signalling requires CycE to induce SC growth and endoreplication**

114 CycE has been implicated in the regulation of endoreplication in several *Drosophila* cell types,  
115 including SCs (Edgar, Zielke, & Gutierrez, 2014; Leiblich et al., 2019). We further studied the  
116 role of CycE in the control of SC growth and endoreplication using the *esg*<sup>tsF/O</sup> driver to  
117 overexpress transgenes specifically in adult SCs under the control of the yeast GAL4  
118 transcription factor (Leiblich et al., 2019, 2012). This line ubiquitously expresses a  
119 temperature-sensitive form of the GAL4 inhibitor GAL80, which blocks *esg*-GAL4-dependent  
120 transgene expression until the temperature is shifted to 28.5°C, which inhibits GAL80 function.  
121 Newly eclosed males were switched from 18°C to 28.5°C for 6 days to express the transgene

122 in SCs. SC growth was measured as a ratio of SC nuclear growth to adjacent MC nuclear  
123 growth (Leiblich et al., 2019).

124

125 Using this system, we confirmed that *CycE* knockdown resulted in a decrease in SC nuclear  
126 growth in both virgin and mated males (Fig.S1A-D, E). Furthermore, consistent with previous  
127 observations (Leiblich et al., 2019), *CycE*-RNAi expression completely inhibited mating-  
128 dependent endoreplication normally seen in 25% of SCs (Fig.S1A-D, F), as assayed by nuclear  
129 incorporation of 5-ethynyl-2'-deoxyuridine (EdU), a synthetic analogue of thymidine delivered  
130 in the food. Contrary to our previous findings, SC growth in knockdown cells was significantly  
131 increased after mating, although this change was only detectable because of the reduced  
132 number of genotypes being compared. *CycE* is therefore required for SC nuclear growth in  
133 virgin and mated males, and for mating-dependent endoreplication, but some endoreplication-  
134 independent growth in mated males does not appear to be mediated by *CycE*.

135

136 Since we had previously shown that the *EcR* is necessary and sufficient to induce  
137 endoreplication in SCs, we determined whether *CycE* is dependent on the *EcR* to promote SC  
138 endoreplication. When *CycE* was co-overexpressed with *EcR*-RNAi, 100% of SCs  
139 endoreplicated (Fig.1A-D, F), and *CycE*-induced nuclear overgrowth was not inhibited  
140 (Fig.1A-D, E), demonstrating that *CycE* acts downstream or independently of *EcR* in this  
141 growth regulatory pathway.

142

### 143 **Activated Rbf suppresses binucleation in SCs**

144 To test the effect of upstream *CycE* regulators on SC growth and endoreplication, we initially  
145 expressed under GAL4/UAS control the constitutively activated Rbf<sup>CA</sup> protein, which has three  
146 of its four phosphorylation sites substituted, thereby making it refractory to regulation by

147 CycE/Cdk2 and CycD/Cdk4 (Xin, Weng, Xu, & Du, 2002). Interestingly, this resulted in  $63 \pm$   
148 12% of SCs becoming mononucleated after 6 days of adult expression (Fig.2A,C,C',I).  
149 Remarkably, we observed that this mononucleate phenotype could be partially reversed to a  
150 binucleate state, when the expression of Rbf<sup>CA</sup> was blocked again (Fig.2E,F,K). To test  
151 whether inhibition of E2F1 is involved in this phenomenon, it was knocked down in SCs,  
152 resulting in  $12 \pm 3\%$  of SCs becoming mononucleated (Fig.2H,I). Since mononucleation is  
153 never observed in controls, this suggests that E2F1 inhibition plays a role in Rbf-induced  
154 mononucleation, and E2F1 is involved in normal maintenance of binucleation in SCs.

155

156 In order to determine whether the nucleation state of MCs is also affected by Rbf, Rbf<sup>CA</sup> was  
157 overexpressed in these cells, using a GAL80<sup>ts</sup>-regulated *Acp26Aa*-GAL4 MC driver  
158 (Fig.2B,D,D',J) (Chapman et al., 2003; Corrigan et al., 2014). Surprisingly, there was no effect  
159 on MC binucleation, but  $86 \pm 3\%$  SCs became mononucleated. These SCs could still  
160 endoreplicate upon mating (Fig.2G), demonstrating that adult endoreplication is not affected  
161 by the nucleation state of SCs and that the mononucleation phenotype is unlikely to be mediated  
162 by transfer of endoreplication-inhibiting Rbf<sup>CA</sup> to SCs. Expression of *E2F1*-RNAi in MCs did  
163 not induce mononucleation either in SCs or MCs (Fig.2 J; Fig.S2C). In summary, these results  
164 suggest that Rbf can control SC nucleation state in two different ways; cell-autonomous  
165 regulation in which E2F1 appears to be partly involved, and paracrine regulation, which may  
166 not require E2F1 inhibition, and where the downstream signals are unknown.

167

### 168 **CycD, Rbf and E2F1 are essential for the regulation of SC growth and endoreplication**

169 Having observed a role for *Rbf* and *E2F1* in SC binucleation, we tested the role of these genes  
170 and their upstream cell cycle regulator CycD in SC growth and endoreplication. Knocking-  
171 down *CycD* in SCs inhibited SC nuclear growth and abolished mating-dependent

172 endoreplication (Fig.3H, K; Fig.S1J). However, similar to when *CycE* was knocked down, we  
173 observed that expression of *CycD*-RNAi did not fully suppress all mating-dependent SC  
174 growth. To test the effect of increased CycD activity, CycD was overexpressed with its kinase  
175 partner, Cdk4, in SCs (Fig.3G, H). All the cells endoreplicated extensively, resulting in  
176 polytene-like chromosomes in both virgin and mated males (Fig.3G',K; Fig.S1I). Taking these  
177 results together, CycD is necessary and sufficient to induce SC growth and endoreplication.

178

179 Overexpression of *Rbf*<sup>CA</sup> suppressed mating-dependent endoreplication and all SC nuclear  
180 growth in virgin and mated males (Fig.3 D, I, L). In these experiments, the ratio of the size of  
181 the single nucleus in mononucleate SCs to the total nuclear area of both nuclei in the adjacent  
182 MC was measured, since the reduction observed in mononucleate cells using this modification  
183 to the measurement of nuclear growth correlated with the reduction in cell area found in  
184 mononucleate versus binucleate SCs (Fig.S3). Expressing *Rbf*-RNAi resulted in an increase in  
185 growth and endoreplication in all SCs in both virgin and mated males (Fig.3C,I,L). Hence, Rbf  
186 normally limits SC endoreplication and growth, and its hyperactivation suppresses all forms of  
187 SC growth in both virgins and mated males.

188

189 To increase E2F1 activity in SCs, it was co-expressed with its dimerization partner, Dumpy  
190 (DP). Increased SC growth was observed and all SCs underwent endoreplication in both virgin  
191 and mated males (Fig.3 E, J, M). Surprisingly, *E2F1* knockdown had no effect on SC growth  
192 in virgin males and growth was increased in mated males versus mated controls. However, all  
193 endoreplication was suppressed after mating (Fig.3 F, J, M). Therefore, E2F1 is not necessary  
194 for endoreplication-independent SC growth in virgin and mated males. Indeed, since  
195 knockdown cells in mated males have larger nuclei than controls after mating, E2F1 appears  
196 to normally suppress growth that occurs without endoreplication after mating, as well as



197 driving endoreplication-associated growth. Knockdown of the other Rbf-regulated *E2F* gene  
198 in *Drosophila*, *E2F2*, had no effect on SC growth and endoreplication (Fig.S4), suggesting that  
199 this gene is not involved in these processes. Since *E2F1* knockdown cells in mated males have  
200 larger nuclei than cells in mated controls, it appears that E2F1 normally suppresses growth that  
201 occurs without endoreplication after mating, as well as driving endoreplication-associated  
202 growth.

203

204 We conclude that the cell cycle components CycD, Rbf and E2F1 all play important roles in  
205 the regulation of adult SC growth and endoreplication, although CycD/Rbf do not seem to act  
206 via E2F1 to control endoreplication-independent SC growth in virgin and mated males.

207

208 **BMP signalling is downstream of CycD, but upstream of E2F1 in the regulation of EcR**  
209 **expression, growth and endoreplication in SCs**

210

211 Since BMP signalling also drives growth and endoreplication in SCs (Leiblich et al., 2019), we  
212 investigated whether the BMP signalling pathway interacts with the CycD/Rbf/E2F1 signalling  
213 axis in these cells. When we co-expressed E2F1/DP with a BMP antagonist, Daughters against  
214 Decapentaplegic (Dad) in SCs, we observed that nuclear growth was much higher than the  
215 controls and not significantly decreased from cells expressing E2F1/DP alone (Fig.4B-D, 4I).  
216 Furthermore, all the SCs expressing E2F1/DP and Dad endoreplicated in virgin males (Fig.4B-  
217 D, 4L).

218

219 By contrast, when CycD/Cdk4 was co-expressed with Dad, Dad completely suppressed all SC  
220 nuclear growth induced by CycD/Cdk4 alone (Fig.4E, J; Fig.S1I). Additionally, only 20% of  
221 SCs showed any endoreplication (Fig.4E, M; Fig.S1I), despite the fact that CycD/Cdk4 can

222 induce multiple rounds of endoreplication in the absence of Dad (Fig.3G'). We attribute this  
223 low level of DNA synthesis to Dad expression incompletely suppressing BMP signalling in  
224 some SCs during the six-day expression period. Therefore, we conclude that CycD acts  
225 upstream of BMP signalling's effects on nuclear growth and endoreplication; in turn, BMP  
226 signalling is upstream of E2F1/DP.

227

228 In order to further investigate how the BMP pathway interacts with the CycD/Rbf/E2F1 axis,  
229 we co-expressed Rbf<sup>CA</sup> and a constitutively active form of a BMP Type-I receptor, Thickveins,  
230 (Tkv<sup>act</sup>) in SCs. This resulted in nuclear growth similar to controls in virgin males (Fig.4F-H,  
231 K). This growth was much reduced compared to when only Tkv<sup>act</sup> was expressed; indeed, it  
232 was not significantly different from the growth observed when Rbf<sup>CA</sup> was expressed alone.  
233 However, surprisingly 80% of the SCs still endoreplicated, phenocopying the effect of Tkv<sup>act</sup>  
234 alone. (Fig.4F-H, N). Overall, we conclude that even though BMP signalling has a dominant  
235 effect on endoreplication when co-modulated with CycD/Rbf signalling, Rbf<sup>CA</sup> overexpression  
236 suppresses the growth-promoting effects of BMP signalling on SC nuclei independently of  
237 endoreplication, suggesting that these two signals interact in different ways to control these  
238 two cellular processes.

239

240 Elevated BMP signalling is known to dramatically increase EcR protein expression in SCs  
241 presumably contributing to the effects of this signalling pathway on SC growth and  
242 endoreplication (Leiblich et al., 2019). Since E2F1 functions downstream of BMP signalling  
243 in endoreplication control, we hypothesised that Rbf/E2F1 might also affect EcR protein levels.  
244 Indeed, EcR protein, detected using a pan-EcR antibody, was greatly increased in comparison  
245 to control cells, when either E2F1/DP or *Rbf*-RNAi were overexpressed in SCs, with EcR  
246 present in the cytoplasm, as well as in all nuclei (Fig.5A-C). Expressing Rbf<sup>CA</sup> in SCs

247 completely suppressed EcR protein expression, mirroring the phenotype observed with  
248 expression of *EcR*-RNAi (Fig.5D-E). However, *E2F1*-RNAi did not have any obvious effect  
249 on EcR protein levels in SCs (Fig.5F), perhaps explaining the weaker effects of this knockdown  
250 on SC nuclear growth compared to Rbf<sup>CA</sup> (Fig.3I, J). To confirm specific staining with the EcR  
251 antibody, we expressed E2F1/DP with *EcR*-RNAi in SCs; no EcR expression was observed  
252 (Fig.5G). We conclude that the BMP-regulated CycD/Rbf/E2F1 axis controls not only SC  
253 nuclear growth and endoreplication, but also expression of EcR protein, another key player in  
254 SC growth.

255

## 256 **Rbf and E2F1 function upstream of the EcR in the hormone-independent regulation of** 257 **SC endoreplication**

258

259 As discussed earlier, *Rb* loss and E2F1 activation increase AR levels in prostate cancer and are  
260 associated with CRPC, in which the AR can promote cell growth and proliferation in a  
261 hormone-independent fashion. Hence, we tested the functional interactions between the  
262 CycD/Rbf/E2F1 signalling axis and the EcR steroid receptor to determine whether these might  
263 be involved in ecdysone-independent growth and endoreplication in SCs, mirroring the effects  
264 in CRPC.

265

266 When E2F1/DP was co-expressed with *EcR*-RNAi, SC nuclei grew to a greater size than  
267 controls or SCs expressing *EcR*-RNAi, but growth was suppressed compared to cells  
268 expressing E2F1/DP alone (Fig.6B-D,J). However, *EcR*-RNAi completely suppressed  
269 E2F1/DP-induced endoreplication (Fig.6B-D, M). Hence, we conclude that E2F1/DP can elicit  
270 some SC growth when EcR expression is suppressed, but, somewhat surprisingly, for SC  
271 endoreplication, E2F1/DP requires the EcR to drive this CycE-dependent event.

272

273 Co-expressing Rbf<sup>CA</sup> with EcR-C produced more variable and intermediate phenotypes,  
274 probably because each SC expresses different relative levels of these transgenes. Whereas  
275 100% of SCs expressing EcR-C alone endoreplicated in virgin males, only 60% endoreplicated  
276 when Rbf<sup>CA</sup> was co-expressed, with some glands exhibiting endoreplication in 100% of SCs  
277 and others in only 2.5%. No endoreplication was observed in SCs expressing Rbf<sup>CA</sup> alone  
278 (Fig.6E-G, K, N). These results suggest that EcR-C is able to induce endoreplication even when  
279 SCs express Rbf<sup>CA</sup>, consistent with our finding that EcR acts downstream of E2F1 in  
280 endoreplication control. Furthermore, nuclear growth levels in SCs of these males were similar  
281 to controls, an intermediate phenotype that suggests Rbf can act somewhat independently of  
282 EcR to control growth, as we also found for E2F1 (Fig.6 J).

283

284 Finally, since endoreplication is regulated by the EcR in a hormone-independent fashion, we  
285 hypothesised that E2F1 activation might also stimulate EcR-mediated genome replication in  
286 the absence of hormone, mirroring events in CRPC. Co-expression of E2F1/DP with an RNAi  
287 targeting *shd*, the gene encoding ecdysone 20-hydroxylase required for the last step in 20-  
288 hydroxyecdysone synthesis, had no inhibitory effect on SC endoreplication and in fact, resulted  
289 in an increase in nuclear growth compared to E2F1/DP expression alone (Fig.7), in sharp  
290 contrast to E2F1/DP co-expression with EcR-RNAi (Fig.6 D, J, M). Therefore, E2F1/DP-  
291 induced SC endoreplication is mediated by hormone-independent EcR signalling and ecdysone  
292 may, in fact, interfere with some aspects of E2F1/DP-mediated nuclear growth.

293

294

295

296

## 297 **Discussion**

298 Multiple mechanisms can contribute to the inevitable emergence of CRPC following androgen-  
299 deprivation therapy, including the late-stage loss of *Rb*, a change that occurs at much earlier  
300 stages in most other cancers. In the prostate, this genetic change increases hormone-  
301 independent AR signalling, in part by increasing AR expression levels, although other  
302 mechanisms are likely to be involved (Sharma et al., 2010). Using the *Drosophila* SC, which  
303 shares several cell biological similarities with prostate epithelial cells, we demonstrate here  
304 that the *Drosophila Rb* homologue, *Rbf*, regulates the receptor for the steroid ecdysone to  
305 suppress SC growth, including the ecdysone-independent growth which is induced after male  
306 flies mate (Fig.8) . Most notably, Rbf inhibits hormone-independent endoreplication observed  
307 after mating, and when the CycD/Rbf/E2F1 axis is activated, the EcR is essential for the  
308 induction of endoreplication. This physiological mechanism is not observed in other  
309 *Drosophila* cell types, but does mirror changes seen in CRPC, suggesting the possibility that  
310 the latter pathological change might reflect a physiological process in human prostate  
311 epithelium that is yet to be characterised.

312

### 313 **Activated Rbf reverses the binucleate state in adult SCs independently of its** 314 **effects on growth and endoreplication**

315 Our study has revealed an interesting additional role for Rbf in controlling the nucleation state  
316 in binucleate adult SCs. Rbf<sup>CA</sup> reversibly induces almost all SCs to become mononucleate, but  
317 has no effect on MC nucleation state. Furthermore, knocking down E2F1 in SCs results in just  
318 a few SCs becoming mononucleate, whereas no effect was observed when E2F1 was knocked  
319 down in MCs. Therefore, SCs appear to require some signalling by the CycD/Rbf/E2F1 axis  
320 to retain their binucleate state in adults.

321

322 Perhaps most surprisingly, expression of the Rbf<sup>CA</sup> construct in MCs results in SC  
323 mononucleation, while MCs retain their binucleate nature. In this case, those SCs, which  
324 become mononucleate, are still able to endoreplicate upon mating. Hence, it appears that an  
325 unknown secreted MC signal, which is not transferred Rbf, can direct mononucleation in SCs.  
326 Since MCs do not become mononucleated, MCs either must lack the proper machinery to  
327 process this mononucleation signal or regulate binucleation in a different way. *E2F1*-RNAi  
328 expression in MCs does not have the capacity to elicit the mononucleation signal to SCs,  
329 indicating that E2F1 is not involved in this signalling mechanism, although this might also be  
330 accounted for by insufficient knockdown of *E2F1* in MCs. Interestingly, a recent study has  
331 shown that although Rb/E2F does not initiate binucleation in mammalian cardiomyocytes, the  
332 binucleate and mononucleate cells have distinct Rb/E2F-mediated transcriptional programmes  
333 (Windmueller et al., 2020), thereby emphasising the importance of this pathway in different  
334 nucleation states.

335

### 336 **CycD/Rbf/E2F1 signalling axis and CycE regulate transition from hormone-** 337 **dependent to hormone-independent EcR signalling in SCs**

338 We have demonstrated that CycD and CycE, are necessary and sufficient for the induction of  
339 endoreplication in SCs, and that they are also required for ecdysone-dependent SC nuclear  
340 growth in virgin males, even though no detectable DNA replication occurs in these cells  
341 (Fig.8). However, they are not needed for at least some of the endoreplication-independent SC  
342 growth that occurs in mated males. In breast cancer and prostate cancer, CycD1 and CycE have  
343 been demonstrated to regulate both ligand-dependent and ligand-independent steroid receptor  
344 signalling, the latter playing a vital role in the initiation of hormone-refractory form of cancer  
345 growth (Bindels, Lallemand, Balkenende, Verwoerd, & Michalides, 2002; Foster, Henley,  
346 Ahamed, & Wimalasena, 2001; Petre, Wetherill, Danielsen, & Knudsen, 2002).

347 CycD-regulated Rbf is also involved in normally suppressing these SC growth regulatory  
348 functions, although expression of a constitutively active form of Rbf appears to be able to block  
349 all growth, even in mated males. By contrast, although E2F1 is necessary and sufficient to  
350 promote endoreplication in SCs, it is not essential for growth that occurs in virgins but appears  
351 to inhibit endoreplication-independent growth in mated males. This suggests that Rbf and E2F1  
352 can act independently to fulfil some of their activity. Rb functions that occur independently of  
353 its E2F transcriptional activity control have been observed in Rb-mediated cell cycle arrest and  
354 chromatin stability in mammalian cells (Dick & Rubin, 2013). The E2F1-independent Rbf  
355 activity that regulates chromatin condensation appears to be conserved in *Drosophila* as well  
356 (Longworth, Herr, Ji, & Dyson, 2008). There is also some evidence pertaining to E2F1 activity  
357 independent of Rbf during early embryogenesis (Shibutani, Swanhart, & Duronio, 2007).  
358 However, canonical Rbf/E2F1 signalling is also active in SCs and is required for  
359 endoreplication-dependent SC growth in mated males.

360

361 Rbf and E2F1 can mediate the effects on SC growth and endoreplication partly by regulating  
362 the EcR protein levels, as previously observed with the BMP signalling (Leiblich et al., 2019).  
363 Epistasis experiments suggest that the BMP and EcR pathways interact with the  
364 CycD/Rbf/E2F1/CycE axis in SCs. BMP signalling intersects the cell cycle regulatory pathway  
365 upstream of E2F1 activity and CycE, and downstream of Rbf and CycD. EcR lies downstream  
366 of CycD/Rbf/E2F1, but upstream of CycE in the regulation of endoreplication and growth in  
367 SCs. Furthermore, we confirmed that E2F1 induces endoreplication and growth in an  
368 ecdysone-independent fashion, which mirrors the effects observed with loss of Rb in CRPC,  
369 which induces unsupervised activation of E2F activity.

370

371 Comprehensive genomic profiling of prostate cancer tumours, cell lines and xenografts has  
372 revealed that Rb signalling is functionally altered in 34% in primary tumours and in 74% of  
373 castration-resistant tumours, thereby stressing the importance of Rb in the emergence of CRPC  
374 (Taylor et al., 2010). Studies in prostate cancer cell lines have demonstrated that Rb/E2F1  
375 interacts (Altintas et al., 2012) and regulates *AR* expression, *AR* transcription and *AR* target  
376 gene expression (Gao et al., 2016; Sharma et al., 2010) to facilitate the development of  
377 hormone-refractory prostate cancer. Interestingly, in a *Drosophila* spinal and bulbar muscular  
378 atrophy model, it was observed that the *Drosophila* Rbf/E2F1 axis functionally interacts with  
379 human polyglutamine repeat expansion *AR* mutants to mediate neurodegeneration in  
380 *Drosophila* eyes (Nedelsky et al., 2010; Suzuki et al., 2009). Although it has not been possible  
381 to assess the highly cell type-specific physical interaction between EcR and Rbf/E2F1 because  
382 of the small number of SCs, it seems likely that part of Rbf/E2F1-dependent regulation of EcR  
383 and its hormone-independent signalling involves physical interaction between the EcR and  
384 these cell cycle regulator proteins. Importantly, while the control of SC nuclear growth by the  
385 BMP/EcR axis and cell cycle regulators appears complex, the regulation of endoreplication is  
386 absolutely dependent on all elements of this network and specifically involves hormone-  
387 independent EcR activity. Overall, the physiological control of SC endoreplication in mated  
388 male flies seems to share many regulatory parallels with the hormone-independent, *AR*-  
389 induced growth and proliferation observed in pathological CRPC, suggesting that SC  
390 endoreplication may be used as a model for investigating genetic interactors involved in CRPC.

391

392

393

394

395



## 396 **Materials and Methods**

397

### 398 ***Drosophila* Stocks and fly husbandry**

399 Following fly stocks were obtained from the Bloomington *Drosophila* Stock Center, unless  
400 other source is mentioned:  $esg^{tsF/O} (w^-; esg-GAL4, UAS-GFP_{nls}; act > CD2 > GAL4, UAS-FLP;$   
401 gift from B. Edgar) (Jiang et al., 2009), *UAS-EcR-RNAi* (TRiP.JF02538) (Colombani, 2005),  
402 *UAS-EcR-C* (Cherbas, Hu, Zhimulev, Belyaeva, & Cherbas, 2003), *UAS-CycE-RNAi*  
403 (TRiP.GL00511), *UAS-CycE* (Richardson, O’Keefe, Marty, & Saint, 1995), *UAS-p53* (gift  
404 from J. Abrams), *UAS-Rbf<sup>CA</sup> (w[\*]; P{w[+mC]=UAS-Rbf.280}3/TM3, Sb[1])* (Xin et al.,  
405 2002), *UAS-Mud-RNAi* (TRiP.HMS01458) (Elkahlah, Rogow, Ahmed, & Clowney, 2020),  
406 *UAS-CycD/cdk4* (gift from B. Edgar) (Datar, Jacobs, De La Cruz, Lehner, & Edgar, 2000),  
407 *UAS-CycD-RNAi* (TRiP.HMS00059) (Kim, Jang, Yang, & Chung, 2017), *UAS-Rbf-RNAi*  
408 (TRiP.HMS03004) (Greenspan & Matunis, 2018), *UAS-E2F1/Dp*, *UAS-E2F1-RNAi* (TRiP.  
409 JF02718) (Zhang et al., 2017), *UAS-Tkv<sup>act</sup>* (gift from K. Basler) (Nellen, Burke, Struhl, &  
410 Basler, 1996), *UAS-Dad* (gift from D. Bennett) (Tsuneizumi et al., 1997), *UAS-shd-RNAi*  
411 (Leiblich et al., 2019). Flies were reared in standard cornmeal agar medium and experimental  
412 crosses were maintained either at 18°C or 25°C. For virgin experiments, newly eclosed virgin  
413 males of the required genotype were collected and kept on food with or without 0.2mM EdU  
414 (see below). For multiply mated experiments, each male was placed in individual vials with  
415 ten virgin  $w^{1118}$  females (Leiblich et al., 2019, 2012; Redhai et al., 2016).

416

### 417 **Immunohistochemistry and microscopy**

418 The protocol used for fixing and immunostaining the AG were performed as reported in our  
419 previous works (Corrigan et al., 2014; Leiblich et al., 2019, 2012; Redhai et al., 2016). Fixed  
420 samples were blocked with PBSTG (PBST with 10% Goat Serum) for 30 min at room

421 temperature and were incubated overnight with primary antibody diluted in PBSTG at 4°C.  
422 They were washed in PBST for 6 X 10 min before being incubated with secondary antibody  
423 (1:400 in PBST) (ThermoFisher) for 30 min at room temperature. Primary antibodies Anti-  
424 FAS3 (Developmental Biology Hybridoma Bank (DSHB); 1:10) and anti-EcR (DSHB; 1:10)  
425 were used in conjunction with fluorescent Alexa-555- (ThermoFisher; 1:400) and Cy3-  
426 (Jackson Laboratories; 1:400) conjugated donkey anti-mouse secondary antibody respectively.  
427 The glands were imaged using an upright Zeiss LSM 880 Airy Scan confocal microscope. The  
428 Zeiss Plan-Apochromat 63X/1.4 NA Oil objective (Carl Zeiss) was used for 63X magnification  
429 and Zeiss Plan-Apochromat 40X/1.3 NA Oil objective (Carl Zeiss) was used for 40X  
430 magnification. Immersion oil of refractive index 1.514 (Cargill labs) was used.

431

#### 432 **SC nuclear growth assay**

433 Z-stack images of the whole SC (3 per gland) were acquired by confocal microscopy as  
434 discussed above. The sum of all stacked images was obtained and analysed using Fiji. For each  
435 selected SC, the sum of the maximum areas of both nuclei and of an MC adjacent to the SC  
436 was calculated. In the case of mononucleate cells (e.g. Rbf<sup>CA</sup>), the area of the single nucleus  
437 was calculated. SC Nuclear Area/MC Nuclear Area was used as a measure of SC growth  
438 (Leiblich et al., 2019, 2012).

439

#### 440 **EdU incorporation assay**

441 The Click-iT™ Plus EdU Cell Proliferation Kit for Imaging (Invitrogen; Alexa Fluor™ 594  
442 dye) was used to detect DNA replication. EdU is a synthetic analogue of thymidine. Flies were  
443 maintained on medium prepared by mixing standard yeast-cornmeal agar medium with a  
444 80mM EdU (Cambridge Bioscience) stock solution after at 60°C (diluted in PBS, as per the  
445 manufacturer's instructions) to reach a final EdU concentration of 0.2mM; 750μL of the 80

446 mM EdU stock solution was used for every 300 mL of yeast-cornmeal agar. In order to detect  
447 EdU incorporation, flies fed on EdU-containing food were dissected, but the testes were kept  
448 intact as a positive control for EdU staining as the adult stem cell niches in the testes undergo  
449 DNA replication and incorporate EdU (de Cuevas & Matunis, 2011). Once suspended in PBST,  
450 tissues were transferred to PBSTG (and incubated for 45 minutes at RT to block, before being  
451 washed with PBST. DNA was labelled by adding the Click-iT<sup>®</sup> reaction mix (prepared  
452 following manufacturer's instructions) to the vials and left to incubate for 30 min at room  
453 temperature, away from light. Glands were washed in PBST for 3 X 10 min and then re-  
454 suspended in PBS. Only AGs from flies whose testes were positively stained for EdU staining  
455 were included for the analysis. The total number of SCs were quantified by counting the  
456 number of GFP-containing SCs (nGFP from *esg<sup>tsF/O</sup>* driver). Percentage of SCs which  
457 incorporated EdU was then used as a measure for endoreplication in the gland.

458

#### 459 **Statistical analyses**

460 Either the mean or geometric mean of SC:MC nuclear area or mean rank of % of EdU  
461 incorporated were compared across different genotypes. The normality or log-normality of the  
462 data were checked using the Shapiro-Wilk normality test and D'Augustino and Pearsons'  
463 normality test. For log-normal data, further analyses were undertaken using log-transformed  
464 data. Bartlett's homogeneity of variance test was used to check for similar (Equation 1)  $\sigma^2$ ; if  
465 variances were similar, One-way ANOVA followed by Tukey's HSD post-hoc test was used  
466 and if variances were dissimilar, Welch ANOVA followed by Games-Howell post-hoc test was  
467 used. If the data were not either normally or log-normally distributed, Kruskal-Wallis test  
468 followed by Dunn's post-hoc test was used. When the data are log-transformed, the analyses  
469 conducted compare the geometric means of the data rather than the arithmetic means.

470 
$$\frac{\sum_{i=1}^N \log(i)}{N} = \log \left( \sqrt[N]{\prod_{i=0}^N i} \right)$$

471 Where  $\frac{\sum_{i=1}^N \log(i)}{N}$  is the arithmetic mean of the log-transformed values and  $\sqrt[N]{\prod_{i=0}^N i}$  is the  
472 geometric mean of the actual data.

473 Therefore, when log-normal data are represented in a scatterplot graph, we show the  
474 geometric means and the corresponding geometric standard deviations.

475

## 476 **Acknowledgements**

477 We are grateful to the Bloomington Drosophila Stock Center and Vienna Drosophila Stock  
478 Center for flies and to the Developmental Studies Hybridoma Bank (DSHB), Iowa, for EcR  
479 antibodies. Microscopy was undertaken in the Micron Oxford Advanced Bioimaging Unit.

480

## 481 **References**

- 482 Altintas, D. M., Shukla, M. S., Goutte-Gattat, D., Angelov, D., Rouault, J. P., Dimitrov, S., &  
483 Samarut, J. (2012). Direct Cooperation Between Androgen Receptor and E2F1 Reveals  
484 a Common Regulation Mechanism for Androgen-Responsive Genes in Prostate Cells.  
485 *Molecular Endocrinology*, 26(9), 1531–1541. <https://doi.org/10.1210/me.2012-1016>
- 486 Bindels, E. M. J., Lallemand, F., Balkenende, A., Verwoerd, D., & Michalides, R. (2002).  
487 Involvement of G1/S cyclins in estrogen-independent proliferation of estrogen receptor-  
488 positive breast cancer cells. *Oncogene*, 21(53), 8158–8165.  
489 <https://doi.org/10.1038/sj.onc.1206012>
- 490 Burkhart, D. L., & Sage, J. (2008, September 24). Cellular mechanisms of tumour  
491 suppression by the retinoblastoma gene. *Nature Reviews Cancer*. Nature Publishing  
492 Group. <https://doi.org/10.1038/nrc2399>

- 493 Chapman, T., Bangham, J., Vinti, G., Seifried, B., Lung, O., Wolfner, M. F., Hazel, S.,  
494 Partridge, L. (2003). The sex peptide of *Drosophila melanogaster*: Female post-mating  
495 responses analyzed by using RNA interference. *Proceedings of the National Academy of*  
496 *Sciences of the United States of America*, 100(17), 9923–9928.  
497 <https://doi.org/10.1073/pnas.1631635100>
- 498 Cherbas, L., Hu, X., Zhimulev, I., Belyaeva, E., & Cherbas, P. (2003). EcR isoforms in  
499 *Drosophila*: testing tissue-specific requirements by targeted blockade and rescue.  
500 *Development*, 130(2), 271–284. <https://doi.org/10.1242/dev.00205>
- 501 Colombani, J. (2005). Antagonistic Actions of Ecdysone and Insulins Determine Final Size in  
502 *Drosophila*. *Science*, 310(5748), 667–670. <https://doi.org/10.1126/science.1119432>
- 503 Corrigan, L., Redhai, S., Leiblich, A., Fan, S. J., Perera, S. M. W., Patel, R., Gandy, C.,  
504 Wainwright, M. S., Morris J. F., Hamdy, F., Goberdhan, D. C. I., Wilson, C. (2014).  
505 BMP-regulated exosomes from *Drosophila* male reproductive glands reprogram female  
506 behavior. *Journal of Cell Biology*, 206(5), 671–688.  
507 <https://doi.org/10.1083/jcb.201401072>
- 508 Datar, S. A., Jacobs, H. W., De La Cruz, A. F. A., Lehner, C. F., & Edgar, B. A. (2000). The  
509 *Drosophila* Cyclin D-Cdk4 complex promotes cellular growth. *EMBO Journal*, 19(17),  
510 4543–4554. <https://doi.org/10.1093/emboj/19.17.4543>
- 511 de Cuevas, M., & Matunis, E. L. (2011). The stem cell niche: Lessons from the *Drosophila*  
512 testis. *Development*, 138(14), 2861–2869. <https://doi.org/10.1242/dev.056242>
- 513 Dick, F. A., & Rubin, S. M. (2013, May). Molecular mechanisms underlying RB protein  
514 function. *Nature Reviews Molecular Cell Biology*. NIH Public Access.  
515 <https://doi.org/10.1038/nrm3567>
- 516 Edgar, B. A., & Orr-Weaver, T. L. (2001, May 4). Endoreplication cell cycles: More for less.  
517 *Cell*. Cell Press. [https://doi.org/10.1016/S0092-8674\(01\)00334-8](https://doi.org/10.1016/S0092-8674(01)00334-8)

- 518 Edgar, B. A., Zielke, N., & Gutierrez, C. (2014). Endocycles: A recurrent evolutionary  
519 innovation for post-mitotic cell growth. *Nature Reviews Molecular Cell Biology*, *15*(3),  
520 197–210. <https://doi.org/10.1038/nrm3756>
- 521 Elkahlah, N. A., Rogow, J. A., Ahmed, M., & Clowney, E. J. (2020). Presynaptic  
522 developmental plasticity allows robust sparse wiring of the drosophila mushroom body.  
523 *ELife*, *9*. <https://doi.org/10.7554/eLife.52278>
- 524 Foster, J. S., Henley, D. C., Ahamed, S., & Wimalasena, J. (2001, September 1). Estrogens  
525 and cell-cycle regulation in breast cancer. *Trends in Endocrinology and Metabolism*.  
526 Elsevier Current Trends. [https://doi.org/10.1016/S1043-2760\(01\)00436-2](https://doi.org/10.1016/S1043-2760(01)00436-2)
- 527 Gao, S., Gao, Y., He, H. H., Han, D., Han, W., Avery, A., Maoska, J. A., Liu, X., Chen, S.,  
528 Ma, F., Chen, S., Balk, S. P., Cai, C. (2016). Androgen Receptor Tumor Suppressor  
529 Function Mediated by Recruitment of Retinoblastoma Protein. *Cell Reports*, *17*(4), 966–  
530 976. <https://doi.org/10.1016/j.celrep.2016.09.064>
- 531 Giacinti, C., & Giordano, A. (2006). RB and cell cycle progression. *Oncogene*, *25*(38), 5220.  
532 <https://doi.org/10.1038/sj.onc.1209615>
- 533 Greenspan, L. J., & Matunis, E. L. (2018). Retinoblastoma Intrinsically Regulates Niche Cell  
534 Quiescence, Identity, and Niche Number in the Adult Drosophila Testis. *Cell Reports*,  
535 *24*(13), 3466–3476.e8. <https://doi.org/10.1016/j.celrep.2018.08.083>
- 536 Harbour, J. W., & Dean, D. C. (2000a). Rb function in cell-cycle regulation and apoptosis.  
537 *Nature Cell Biology*. Nature Publishing Group. <https://doi.org/10.1038/35008695>
- 538 Harbour, J. W., & Dean, D. C. (2000b, October 1). The Rb/E2F pathway: Expanding roles  
539 and emerging paradigms. *Genes and Development*. Cold Spring Harbor Laboratory  
540 Press. <https://doi.org/10.1101/gad.813200>
- 541 Jiang, H., Patel, P. H., Kohlmaier, A., Grenley, M. O., McEwen, D. G., & Edgar, B. A.  
542 (2009). Cytokine/Jak/Stat Signaling Mediates Regeneration and Homeostasis in the

- 543 *Drosophila* Midgut. *Cell*, *137*(7), 1343–1355. <https://doi.org/10.1016/j.cell.2009.05.014>
- 544 Kim, W., Jang, Y. G., Yang, J., & Chung, J. (2017). Spatial Activation of TORC1 Is  
545 Regulated by Hedgehog and E2F1 Signaling in the *Drosophila* Eye. *Developmental Cell*,  
546 *42*(4), 363–375.e4. <https://doi.org/10.1016/j.devcel.2017.07.020>
- 547 Lee, G. T., Jung, Y. S., Ha, Y. S., Kim, J. H., Kim, W. J., & Kim, I. Y. (2013). Bone  
548 morphogenetic protein-6 induces castration resistance in prostate cancer cells through  
549 tumor infiltrating macrophages. *Cancer Science*, *104*(8), 1027–1032.  
550 <https://doi.org/10.1111/cas.12206>
- 551 Leiblich, A., Hellberg, J. E. E. U., Sekar, A., Gandy, C., Mendes, C. C., Redhai, S., Mason,  
552 J., Wainwright, M, S., Marie, P., Goberdhan, D, C, I., Hamdy, F, C., Wilson, C. (2019).  
553 Mating induces switch from hormone-dependent to hormone-independent steroid  
554 receptor–mediated growth in *Drosophila* secondary cells. *PLoS Biology*, *17*(10),  
555 e3000145. <https://doi.org/10.1371/journal.pbio.3000145>
- 556 Leiblich, A., Marsden, L., Gandy, C., Corrigan, L., Jenkins, R., Hamdy, F., Wilson, C.  
557 (2012). Bone morphogenetic protein- and mating-dependent secretory cell growth and  
558 migration in the *Drosophila* accessory gland. *PNAS*, *109*(47), 19292–19297.  
559 <https://doi.org/10.1073/pnas.1214517109/->  
560 [/DCSupplemental.www.pnas.org/cgi/doi/10.1073/pnas.1214517109](https://www.pnas.org/cgi/doi/10.1073/pnas.1214517109)
- 561 Longworth, M. S., Herr, A., Ji, J. Y., & Dyson, N. J. (2008). RBF1 promotes chromatin  
562 condensation through a conserved interaction with the Condensin II protein dCAP-D3.  
563 *Genes and Development*, *22*(8), 1011–1024. <https://doi.org/10.1101/gad.1631508>
- 564 Nedelsky, N. B., Pennuto, M., Smith, R. B., Palazzolo, I., Moore, J., Nie, Z., Neale, G.,  
565 Taylor, J. P. (2010). Native functions of the androgen receptor are essential to  
566 pathogenesis in a *drosophila* model of spinobulbar muscular atrophy. *Neuron*, *67*(6),  
567 936–952. <https://doi.org/10.1016/j.neuron.2010.08.034>

- 568 Nellen, D., Burke, R., Struhl, G., Basler, K. (1996). Direct and long-range action of a DPP  
569 morphogen gradient. *Cell*, 85(3), 357–368. <https://doi.org/10.1016/S0092->  
570 8674(00)81114-9
- 571 Petre, C. E., Wetherill, Y. B., Danielsen, M., Knudsen, K. E. (2002). Cyclin D1: Mechanism  
572 and consequence of androgen receptor co-repressor activity. *Journal of Biological*  
573 *Chemistry*, 277(3), 2207–2215. <https://doi.org/10.1074/jbc.M106399200>
- 574 Ravi Ram, K., Wolfner, M. F. (2009). A network of interactions among seminal proteins  
575 underlies the long-term postmating response in *Drosophila*. *Proceedings of the National*  
576 *Academy of Sciences of the United States of America*, 106(36), 15384–15389.  
577 <https://doi.org/10.1073/pnas.0902923106>
- 578 Redhai, S., Hellberg, J. E. E. U., Wainwright, M., Perera, S. W., Castellanos, F., Kroeger, B.,  
579 Gandy, C., Leiblich, A., Corrigan, C., Hilton, T., Patel, B., Fan, S. J., Hamdy, F.,  
580 Goberdhan, D, C, I., Wilson, C. (2016). Regulation of Dense-Core Granule  
581 Replenishment by Autocrine BMP Signalling in *Drosophila* Secondary Cells. *PLoS*  
582 *Genetics*, 12(10), 1–32. <https://doi.org/10.1371/journal.pgen.1006366>
- 583 Richardson, H., O’Keefe, L. V, Marty, T., Saint, R. (1995). Ectopic cyclin E expression  
584 induces premature entry into S phase and disrupts pattern formation in the *Drosophila*  
585 eye imaginal disc. *Development*, 121(10), 3371 LP – 3379. Retrieved from  
586 <http://dev.biologists.org/content/121/10/3371.abstract>
- 587 Sharma, A., Yeow, W. S. W., Ertel, A., Coleman, I., Clegg, N., Thangavel, C., Morissey, C.,  
588 Zhang, X., Comstock, C, E, S., Witkiewicz, A, K., Gomella, L., Knudsen, E, S., Nelson,  
589 P, S., Knudsen, K. E. (2010). The retinoblastoma tumor suppressor controls androgen  
590 signaling and human prostate cancer progression. *Journal of Clinical Investigation*,  
591 120(12), 4478–4492. <https://doi.org/10.1172/JCI44239>
- 592 Shibutani, S., Swanhart, L. M., & Duronio, R. J. (2007). Rbf1-independent termination of



593 E2f1-target gene expression during early *Drosophila* embryogenesis. *Development*,  
594 134(3), 467–478. <https://doi.org/10.1242/dev.02738>

595 Suzuki, E., Zhao, Y., Ito, S., Sawatsubashi, S., Murata, T., Furutani, T., Shirode, Y.,  
596 Yamagata, K., Tanabe, M., Kimura, S., Ueda, T., Fujiyama, ., Lim, J., Matsukawa, H.,  
597 Kouzmenko, , P., Aigaki, T., Tabata, T., Takeyama, K., Kato, S. (2009). Aberrant E2F  
598 activation by polyglutamine expansion of androgen receptor in SBMA neurotoxicity.  
599 *Proceedings of the National Academy of Sciences of the United States of America*,  
600 106(10), 3818–3822. <https://doi.org/10.1073/pnas.0809819106>

601 Taniguchi, K., Kokuryo, A., Imano, T., Minami, R., Nakagoshi, H., & Adachi-yamada, T.  
602 (2012). Binucleation of *Drosophila* Adult Male Accessory Gland Cells Increases  
603 Plasticity of Organ Size for Effective Reproduction. *Biological Systems : Open Access*,  
604 1(1), 1–5. <https://doi.org/10.4172/bs0.1000e101>

605 Taylor, B. S., Schultz, N., Hieronymus, H., Gopalan, A., Xiao, Y., Carver, B. S., Arora, V,  
606 K., Kaushik, P., Cerami, E., Reva, B., Antipin, Y., Mitsiades, N., Landers, T., Dolgalev,  
607 I., Major, J, E., Wilson, M., Socci, N, D., Lash, A, E., Heguy, A., Eastham, J, A., Scher,  
608 H., , Reuter, V, E., Scardino, P, T., Sander, C., Sawyers, C, L., Gerald, W. L. (2010).  
609 Integrative Genomic Profiling of Human Prostate Cancer. *Cancer Cell*, 18(1), 11–22.  
610 <https://doi.org/10.1016/j.ccr.2010.05.026>

611 Thangavel, C., Boopathi, E., Liu, Y., Haber, A., Ertel, A., Bhardwaj, A., Addya, S.,  
612 Williams, N., Ciment, S, J., Cotzia, P., Dean, J, L., Snook, A., McNair, C., Price, M.,  
613 Hernandez, J, R., Zhao, S, G., Birbe, R., McCarthy, J, B., Turley, E, A., Pienta, K, J.,  
614 Feng, F, Y., Dicker, A, P., Knudsen, K, E., Den, R. B. (2017). RB loss promotes  
615 prostate cancer metastasis. *Cancer Research*, 77(4), 982–995.  
616 <https://doi.org/10.1158/0008-5472.CAN-16-1589>

617 Tsuneizumi, K., Nakayama, T., Kamoshida, Y., Kornberg, T. B., Christian, J. L., & Tabata,

- 618 T. (1997). Daughters against dpp modulates dpp organizing activity in *Drosophila* wing  
619 development. *Nature*, 389(6651), 627–631. <https://doi.org/10.1038/39362>
- 620 Wigby, S., Brown, N. C., Allen, S. E., Misra, S., Sitnik, J. L., Sepil, I., Clark, A. G., Wolfner,  
621 M. F. (2020). The *Drosophila* seminal proteome and its role in postcopulatory sexual  
622 selection. *Philosophical Transactions of the Royal Society of London B Biological*  
623 *Sciences*, 375(1813), 20200072. <https://doi.org/10.1098/rstb.2020.0072>
- 624 Wilson, C., Leiblich, A., Goberdhan, D. C. I., & Hamdy, F. (2017). The *Drosophila*  
625 Accessory Gland as a Model for Prostate Cancer and Other Pathologies. In *Current*  
626 *topics in developmental biology* (Vol. 121, pp. 339–375). Academic Press.  
627 <https://doi.org/10.1016/bs.ctdb.2016.06.001>
- 628 Windmueller, R., Leach, J. P., Babu, A., Zhou, S., Morley, M. P., Wakabayashi, A.,  
629 Petrenko, N. B., Viatour, P., Morrissey, E. E. (2020). Direct Comparison of  
630 Mononucleated and Binucleated Cardiomyocytes Reveals Molecular Mechanisms  
631 Underlying Distinct Proliferative Competencies. *Cell Reports*, 30(9), 3105-3116.e4.  
632 <https://doi.org/10.1016/j.celrep.2020.02.034>
- 633 Xin, S., Weng, L., Xu, J., & Du, W. (2002). The role of RBF in developmentally regulated  
634 cell proliferation in the eye disc and in Cyclin D/Cdk4 induced cellular growth.  
635 *Development*, 129(6), 1345–1356.
- 636 Zhang, P., Pei, C., Wang, X., Xiang, J., Sun, B. F., Cheng, Y., Qi, X., Marchetti, M., Xu, J.,  
637 Sun, Y., Edgar, B. A., Yuan, Z. (2017). A Balance of Yki/Sd Activator and E2F1/Sd  
638 Repressor Complexes Controls Cell Survival and Affects Organ Size. *Developmental*  
639 *Cell*, 43(5), 603-617.e5. <https://doi.org/10.1016/j.devcel.2017.10.033>
- 640 Zielke, N., Edgar, B. A., & DePamphilis, M. L. (2013, January 1). Endoreplication. *Cold*  
641 *Spring Harbor Perspectives in Biology*. Cold Spring Harbor Laboratory Press.  
642 <https://doi.org/10.1101/cshperspect.a012948>

643 Zong, Y., & Goldstein, A. S. (2013). Adaptation or selection - Mechanisms of castration-

644 resistant prostate cancer. *Nature Reviews Urology*, 10(2), 90–98.

645 <https://doi.org/10.1038/nrurol.2012.237>

646

647

648

649

650

651

652

653

654

655

656

657

658

659

660

661 **Figure Legends**

662 **Figure 1: EcR is not required for CycE-induced SC growth and endoreplication**

663 (A-D) Images show distal tip of AGs from 6-day old adult virgin males expressing nuclear  
664 GFP alone (control; this also stains the cytosol) or in combination with additional transgenes  
665 in SCs under the control of the *esg<sup>tsF/O</sup>* driver and stained for EdU incorporation in SCs. Nuclei  
666 are stained with DAPI (blue). Red arrows point to EdU<sup>+</sup> SC nuclei and yellow arrows point to  
667 EdU<sup>-</sup> SC nuclei for each transgene. (E-F) Histograms depicting the mean ratio of the size of  
668 SC nuclei relative to neighbouring MC (E) and the mean % of EdU<sup>+</sup> SCs per gland (F) of virgin  
669 males expressing no transgene, *EcR*-RNAi, *CycE* or *EcR*-RNAi + *CycE* in SCs. Knocking  
670 down *EcR* does not affect *CycE*-mediated SC growth and endoreplication. Welch ANOVA;  
671 Games-Howell post hoc test;  $n \geq 15$  cells (E). Kruskal Wallis test; Dunn's post hoc test;  $n \geq 8$   
672 glands (F). Scale bars correspond to 20  $\mu$ m. The error bars show the standard deviation within  
673 the sample.  $0.0001 < ***p \leq 0.001$ ;  $****p \leq 0.0001$ .

674

675 **Figure 2: Rbf/E2F1 axis maintains adult SC nucleation state**

676 (A-D) Images show distal tip of AGs from 6-day-old adult virgin males of control glands or  
677 glands expressing *Rbf<sup>CA</sup>* either under the control of the *esg<sup>tsF/O</sup>* driver (A,C) or the *Acp26Aa*-  
678 *GAL4* driver (B,D) which activates nuclear GFP production (stains cytoplasm in A,C). Orange  
679 boxes outline the area zoomed in the inset (C',D'). (E) Image shows distal tip of an AG from  
680 a 3-day-old adult virgin male expressing *Rbf<sup>CA</sup>* in SCs under the *esg<sup>tsF/O</sup>* control. (F) Image  
681 shows distal tip of an AG from a 6-day-old virgin male expressing *Rbf<sup>CA</sup>* in SCs for 3 days  
682 since eclosion, followed by 3 days of no *Rbf<sup>CA</sup>* expression. (G) Image shows the distal tip of  
683 an AG of a 6-day-old multiply-mated male expressing *Rbf<sup>CA</sup>* under the control of the *Acp26Aa*-  
684 *GAL4* driver. The AG was stained for EdU, revealing that mononucleate SCs are able to  
685 endoreplicate. (A-G) Nuclei are stained with DAPI (blue). Dashed red ellipses mark the outline

686 of mononucleate SCs; dashed yellow ellipses mark the outline of binucleate SCs; red arrows  
687 mark the nuclei of mononucleate SCs; yellow arrows mark the nuclei of binucleate SCs. (H-J)  
688 Histogram depicting the mean % of mononucleate SCs per gland of virgin males of control  
689 glands or glands expressing transgenes either in SCs (H-I) or MCs (J). Expression of  $Rbf^{CA}$   
690 either in SCs or MCs induces SC mononucleation in a reversible manner, but no such effects  
691 are observed in MCs. Knocking down *E2F1* in SCs promotes SC mononucleation but no effect  
692 is observed when knocked down in MCs. Kruskal Wallis test; Dunn's post hoc test;  $n \geq 6$  glands  
693 (H-J). Scale bars correspond to 50  $\mu\text{m}$  (A-G) and 10  $\mu\text{m}$  (C', D').  $0.01 \leq *p \leq 0.05$ ;  
694 \*\*\*\* $p \leq 0.0001$ . (K) Schematic detailing nucleation state regulation in adult SCs. Expression of  
695 a constitutively active form of Rbf,  $Rbf^{CA}$ , which has mutations in three of its four CDK  
696 phosphorylation sites, in SCs is able to induce mononucleation. This phenotype is negatively  
697 regulated by E2F1. Additionally, expression of  $Rbf^{CA}$  in MCs is able to activate  
698 mononucleation in SCs, presumably by secreting 'X' which could activate an unknown  
699 receptor (?) which regulates SC nucleation state. It is possible that  $Rbf^{CA}$  when expressed in  
700 SCs also promotes mononucleation via this unknown receptor.

701

### 702 **Figure 3: Cell cycle components regulate SC growth and endoreplication**

703 (A-G) Images show distal tip of AGs from 6-day old adult virgin males expressing nuclear  
704 GFP alone (control; this also stains the cytosol) or in combination with additional transgenes  
705 in SCs under the control of the  $esg^{tsF/O}$  driver and stained for EdU incorporation in SCs. Nuclei  
706 are stained with DAPI (blue). Red arrows point to  $EdU^+$  SC nuclei and yellow arrows point to  
707  $EdU^-$  SC nuclei for each transgene (G') Magnified negative image of orange square in image  
708 G to highlight the polytene-like nuclei in SCs overexpressing *CycD/cdk4*. (H-M) Histograms  
709 depicting the geometric mean ratio of the size of SC nuclei relative to neighbouring MC nuclei  
710 (H-J) and mean % of  $EdU^+$  SCs per gland (K-M) of virgin and mated males of control glands

711 and glands expressing different transgenes in SCs. *CycD* is necessary and sufficient to promote  
712 SC growth and endoreplication. Knocking down *CycD* is unable to completely suppress SC  
713 growth between the respective virgin and mated males, which as seen in K, is associated with  
714 mating-induced, endoreplication-independent SC growth. *Rbf* negatively regulates SC growth  
715 and endoreplication in virgin and mated males. *E2F1* is not necessary for SC growth in virgins,  
716 but in mated males, it appears that overall it negatively regulates growth, which EdU analysis  
717 indicates is endoreplication-independent. Welch ANOVA on log-transformed data; Games-  
718 Howell post hoc test (H-J). Kruskal Wallis test; Dunn's post hoc test (K-M).  $n \geq 24$  cells (H);  
719  $n \geq 33$  cells (I);  $n \geq 12$  cells (J);  $n \geq 9$  glands (K);  $n \geq 7$  glands (L);  $n \geq 9$  glands (M). Scale bars  
720 correspond to 20  $\mu\text{m}$ . The error bars show the geometric standard deviation (H-J) and standard  
721 deviation (K-M) within the sample.  $0.01 < *p < 0.05$ ;  $0.001 < **p \leq 0.01$ ;  $0.0001 < ***p \leq 0.001$ ;  
722  $****p \leq 0.0001$ .

723

724 **Figure 4: Interaction between *CycD*/*Rbf*/*E2F1* and BMP signalling in the regulation of**  
725 **SC growth and endoreplication**

726 (A-H) Images show distal tip of AGs from 6-day old adult virgin males expressing nuclear  
727 GFP alone (control; this also stains the cytosol) or in combination with additional transgenes  
728 in SCs under the control of the *esg<sup>tsF/O</sup>* driver and stained for EdU incorporation in SCs. Nuclei  
729 are stained with DAPI (blue). Red arrows point to EdU<sup>+</sup> SC nuclei and yellow arrows point to  
730 EdU<sup>-</sup> SC nuclei for each transgene. (I-N) Histograms depicting the mean SC:MC nuclear area  
731 (I), geometric mean SC:MC nuclear area (J-K) and mean % of EdU<sup>+</sup> SCs per gland (L-N) of  
732 virgin males of control glands and glands expressing different transgenes in SCs. *Dad* is not  
733 able to suppress *E2F1*/*DP*-mediated SC growth and endoreplication, but *Dad* is able to  
734 suppress *CycD*/*cdk4*-mediated SC growth and endoreplication. *Rbf<sup>CA</sup>* suppresses most of the  
735 growth induced by *Tkv<sup>act</sup>*, however *Rbf<sup>CA</sup>* is not able to suppress *Tkv<sup>act</sup>*-induced

736 endoreplication. Welch ANOVA; Games-Howell post hoc test (I). Welch ANOVA on log-  
737 transformed data; Games-Howell post hoc test (J-K). Kruskal Wallis test; Dunn's post hoc test  
738 (L-N).  $n \geq 12$  cells (I);  $n \geq 18$  cells (J);  $n \geq 13$  cells (K);  $n \geq 9$  glands (L);  $n \geq 9$  glands (M);  $n \geq 6$   
739 glands (N). Scale bars correspond to 20  $\mu\text{m}$ . The error bars show the standard deviation (I, L-  
740 N) and geometric standard deviation (J-K) within the sample.  $0.01 < *p < 0.05$ ;  $0.001 < **p \leq 0.01$ ;  
741  $0.0001 < ***p \leq 0.001$ ;  $****p \leq 0.0001$ .

742

### 743 **Figure 5: Rbf/E2F1 regulates EcR protein levels in SCs**

744 (A-G) Images show distal tip of AGs from 6-day old adult virgin males expressing nuclear  
745 GFP alone (control; this also stains the cytosol) or in combination with additional transgenes  
746 in SCs under the control of the *esg<sup>tsF/O</sup>* driver and stained with a pan-EcR antibody (red) in  
747 SCs. Nuclei are stained with DAPI (blue). Red arrows mark SCs expressing EcR. Yellow  
748 arrows mark muscle cells expressing EcR as a control for EcR staining in glands which do not  
749 have EcR expression in SCs (E,F). Rbf negatively regulates EcR protein levels in SCs (C,F).  
750 Although overexpression of E2F1/DP results in an increase in EcR expression in SCs,  
751 expression of *E2F1*-RNAi does not appear to affect EcR protein levels. Scale bars correspond  
752 to 50  $\mu\text{m}$ .

753

### 754 **Figure 6: Rbf/E2F1 interacts with the EcR to regulate SC growth and hormone- 755 independent endoreplication**

756 (A-I) Images show distal tip of AGs from 6-day old adult virgin males expressing nuclear GFP  
757 alone (control; this also stains the cytosol) or in combination with additional transgenes in SCs  
758 under the control of the *esg<sup>tsF/O</sup>* driver and stained for EdU incorporation in SCs. Nuclei are  
759 stained with DAPI (blue). Red arrows point to EdU<sup>+</sup> SC nuclei and yellow arrows point to  
760 EdU<sup>-</sup> SC nuclei for each transgene. (J-O) Histograms depicting the geometric mean SC:MC

761 nuclear area (J-K), mean SC:MC nuclear area (L) and mean % of EdU+ SCs per gland (M-O)  
762 of virgin males of control glands and glands expressing different transgenes in SCs. E2F1 can  
763 promote some growth in SCs independently of EcR. However, E2F1-mediated endoreplication  
764 in SCs requires the ecdysone-independent EcR signalling. Rbf can either interact with EcR or  
765 act independently to negatively regulate SC growth. Welch ANOVA on log-transformed data;  
766 Games-Howell post hoc test (J-K). Welch ANOVA; Games-Howell post hoc test (L). Kruskal  
767 Wallis test; Dunn's post hoc test (M-O).  $n \geq 15$  cells (J);  $n \geq 39$  cells (K);  $n \geq 15$  cells (L);  $n \geq 7$   
768 glands (M);  $n \geq 11$  glands (N);  $n \geq 7$  glands (O). Scale bars correspond to 20  $\mu\text{m}$ . The error bars  
769 show the geometric standard deviation (J-K) and standard deviation (K-M) within the sample.  
770  $0.01 < *p < 0.05$ ;  $0.001 < **p \leq 0.01$ ;  $0.0001 < ***p \leq 0.001$ ;  $****p \leq 0.0001$ .

771

772 **Figure 7: Schematic detailing cell cycle regulation of SC growth and genome**  
773 **endoreplication**

774 In virgin males, CycD, Rbf and CycE regulate SC growth, but E2F1 does not play a role in this  
775 regulation. In mated males, CycD/Rbf/E2F1/CycE regulates SC growth that occurs through  
776 endoreplication. Interestingly, it appears that E2F1 requires EcR to activate endoreplication,  
777 but whether either E2F1 or EcR can exert their control through CycE to regulate  
778 endoreplication is not known. Rbf can inhibit SC growth that occurs without endoreplication  
779 in mated males, but it appears that knocking down CycD or CycE is not able to suppress this  
780 growth. Furthermore, CycD/Rbf /E2F1 is an upstream regulator of EcR, while CycE acts  
781 downstream of EcR. BMP signalling interacts with the cell cycle regulatory axis downstream  
782 of Rbf but upstream of E2F1. Therefore, in SCs, the cell cycle machinery has a distinct role  
783 from its cell cycle regulation that involves an important input from the EcR. cdk4/2- cyclin  
784 dependent kinase 4/2; CycD- Cyclin D; CycE- Cyclin E; Dp- Dumpy; Dpp-Decapentaplegic;  
785 Ec-Ecdysone; EcR-Ec receptor; Med-Medea; P- Phosphate group; Rbf-Retinoblastoma; Tkv-



786 Thickveins; Usp-Ultraspiracle; Wit-Wishful thinking; blue ?-unknown EcR partners. Red  
787 arrows depict the pathways that regulate SC growth and endoreplication and the dotted arrows  
788 show probable signalling interactions.

789

790

791 **Figure 8: Schematic detailing nucleation state regulation in adult SCs**

792 Expression of a constitutively active form of Rbf, Rbf<sup>CA</sup>, which has mutations in three of its  
793 four CDK phosphorylation sites, in SCs is able to induce mononucleation. This phenotype is  
794 negatively regulated by E2F1 and positively regulated by p53. Additionally, expression of  
795 Rbf<sup>CA</sup> in MCs is able to activate mononucleation in SCs, presumably by secreting ‘X’ which  
796 could activate an unknown receptor (?) which regulates SC nucleation state. It is possible that  
797 Rbf<sup>CA</sup> when expressed in SCs also promotes mononucleation via this unknown receptor.

798

799 **Figure 1:**

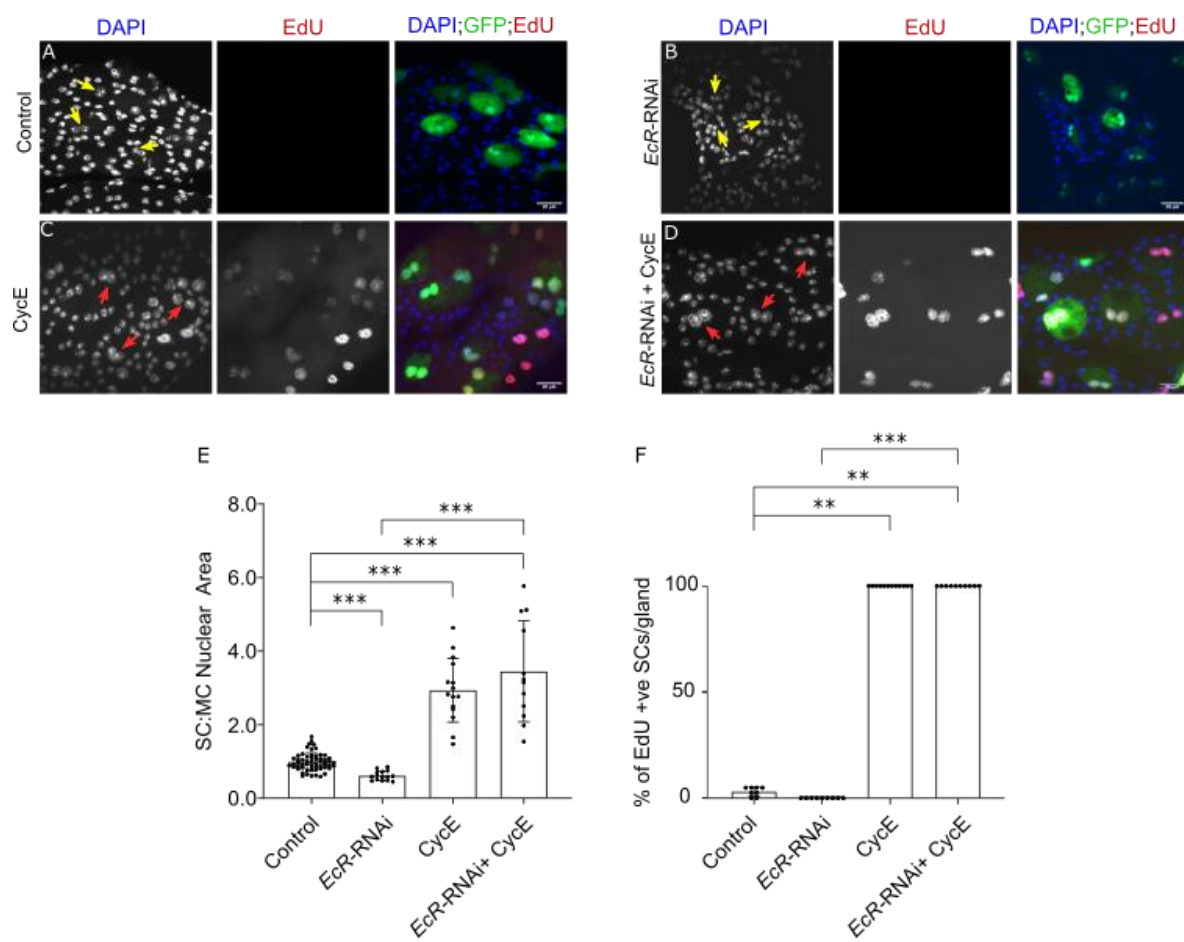

800

801

802

803

804 **Figure 2:**

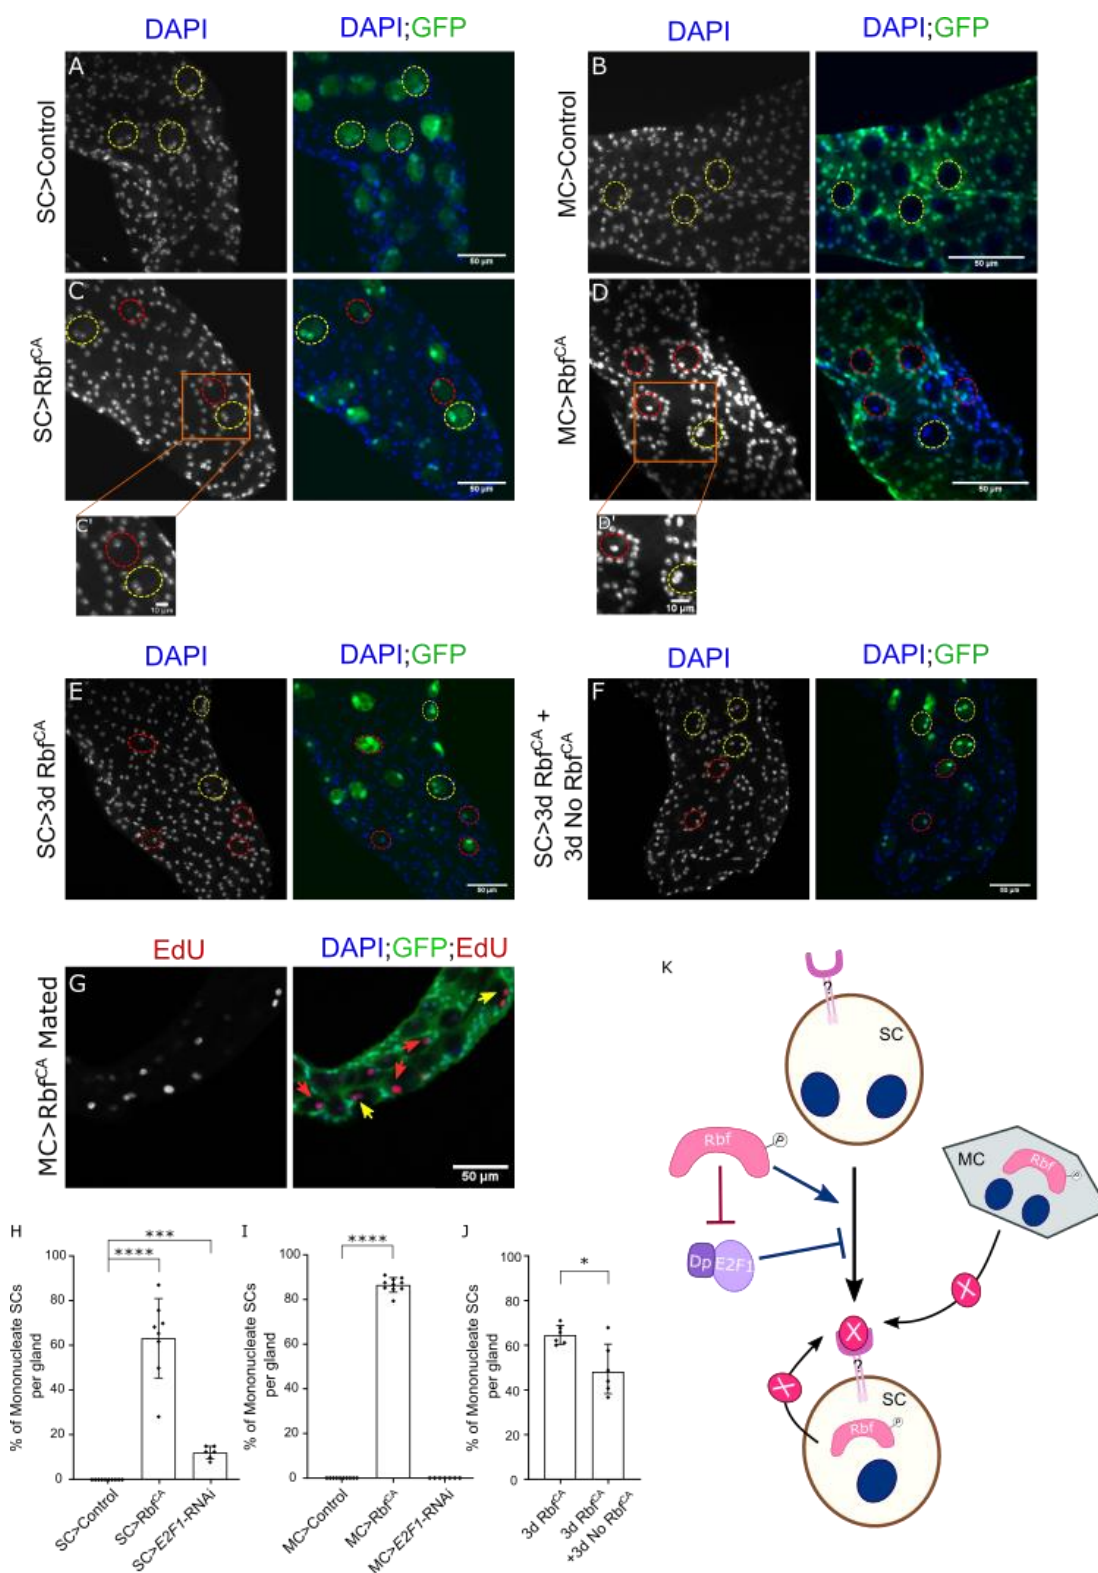

805

806

807 **Figure 3:**

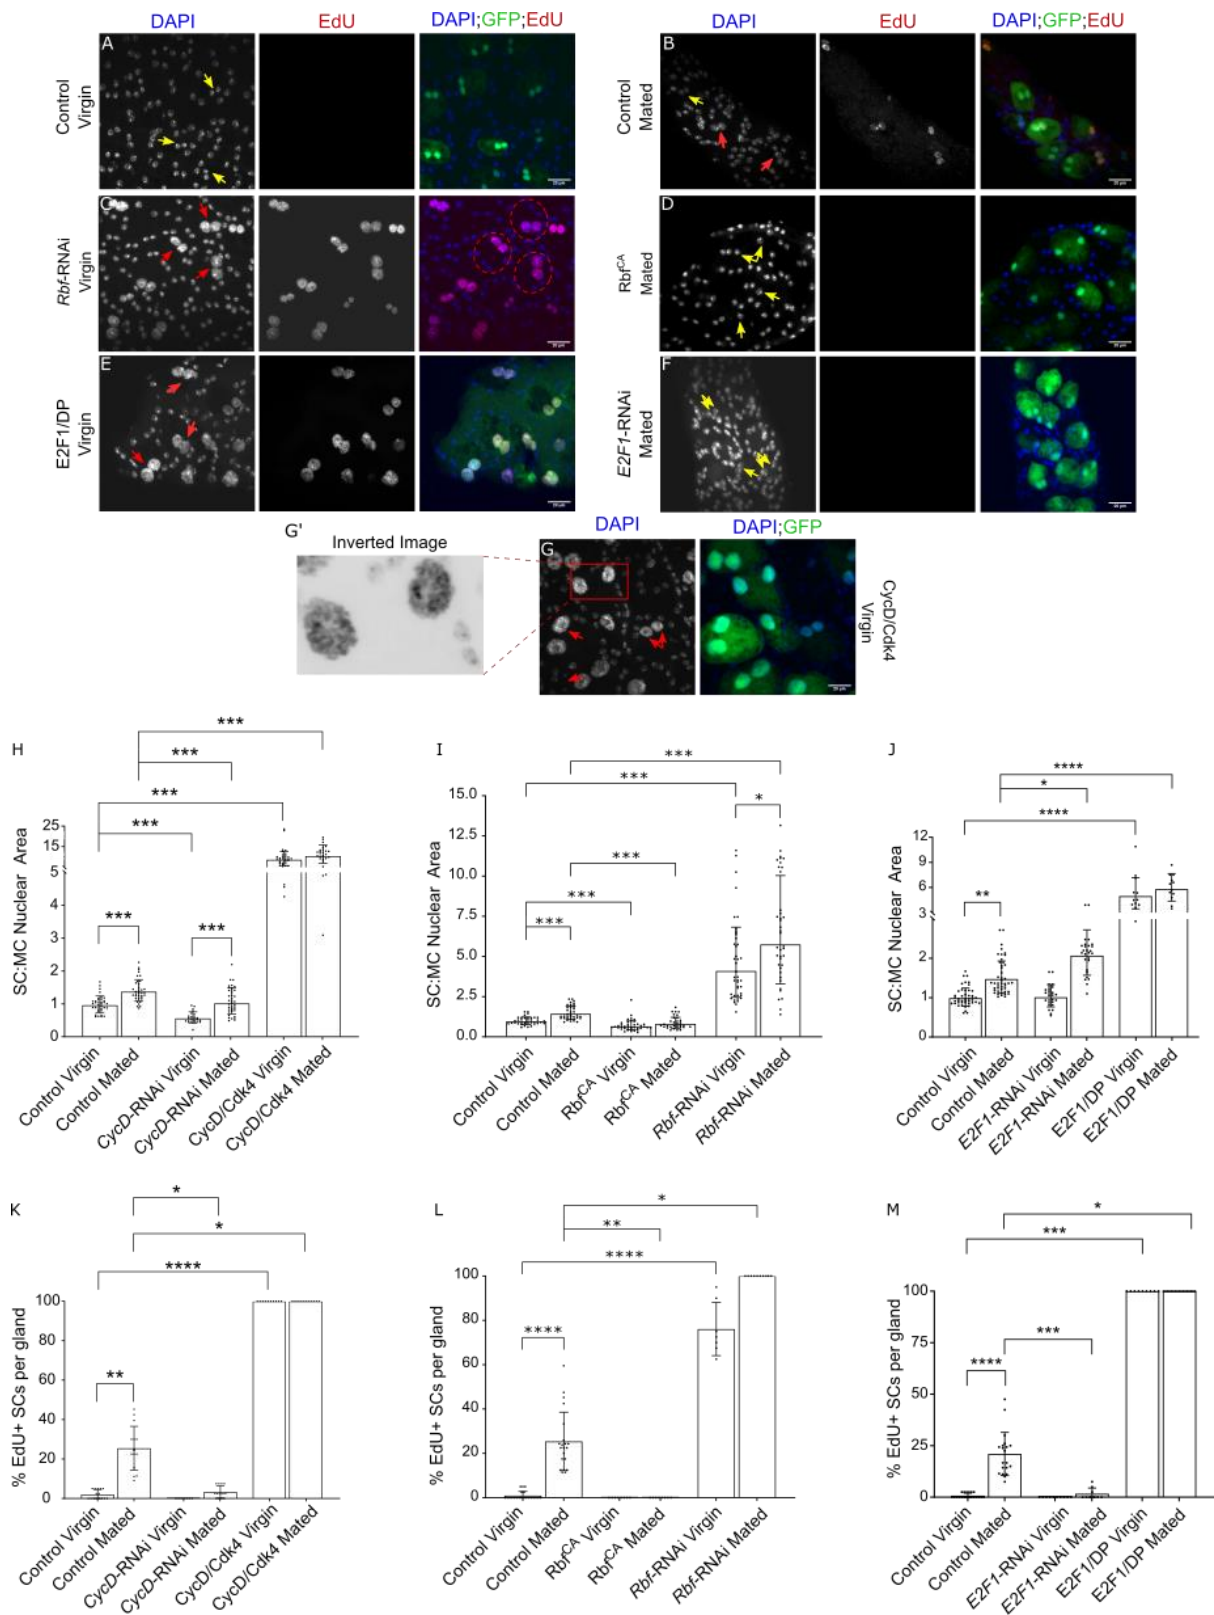

808

809

810

811 **Figure 4**

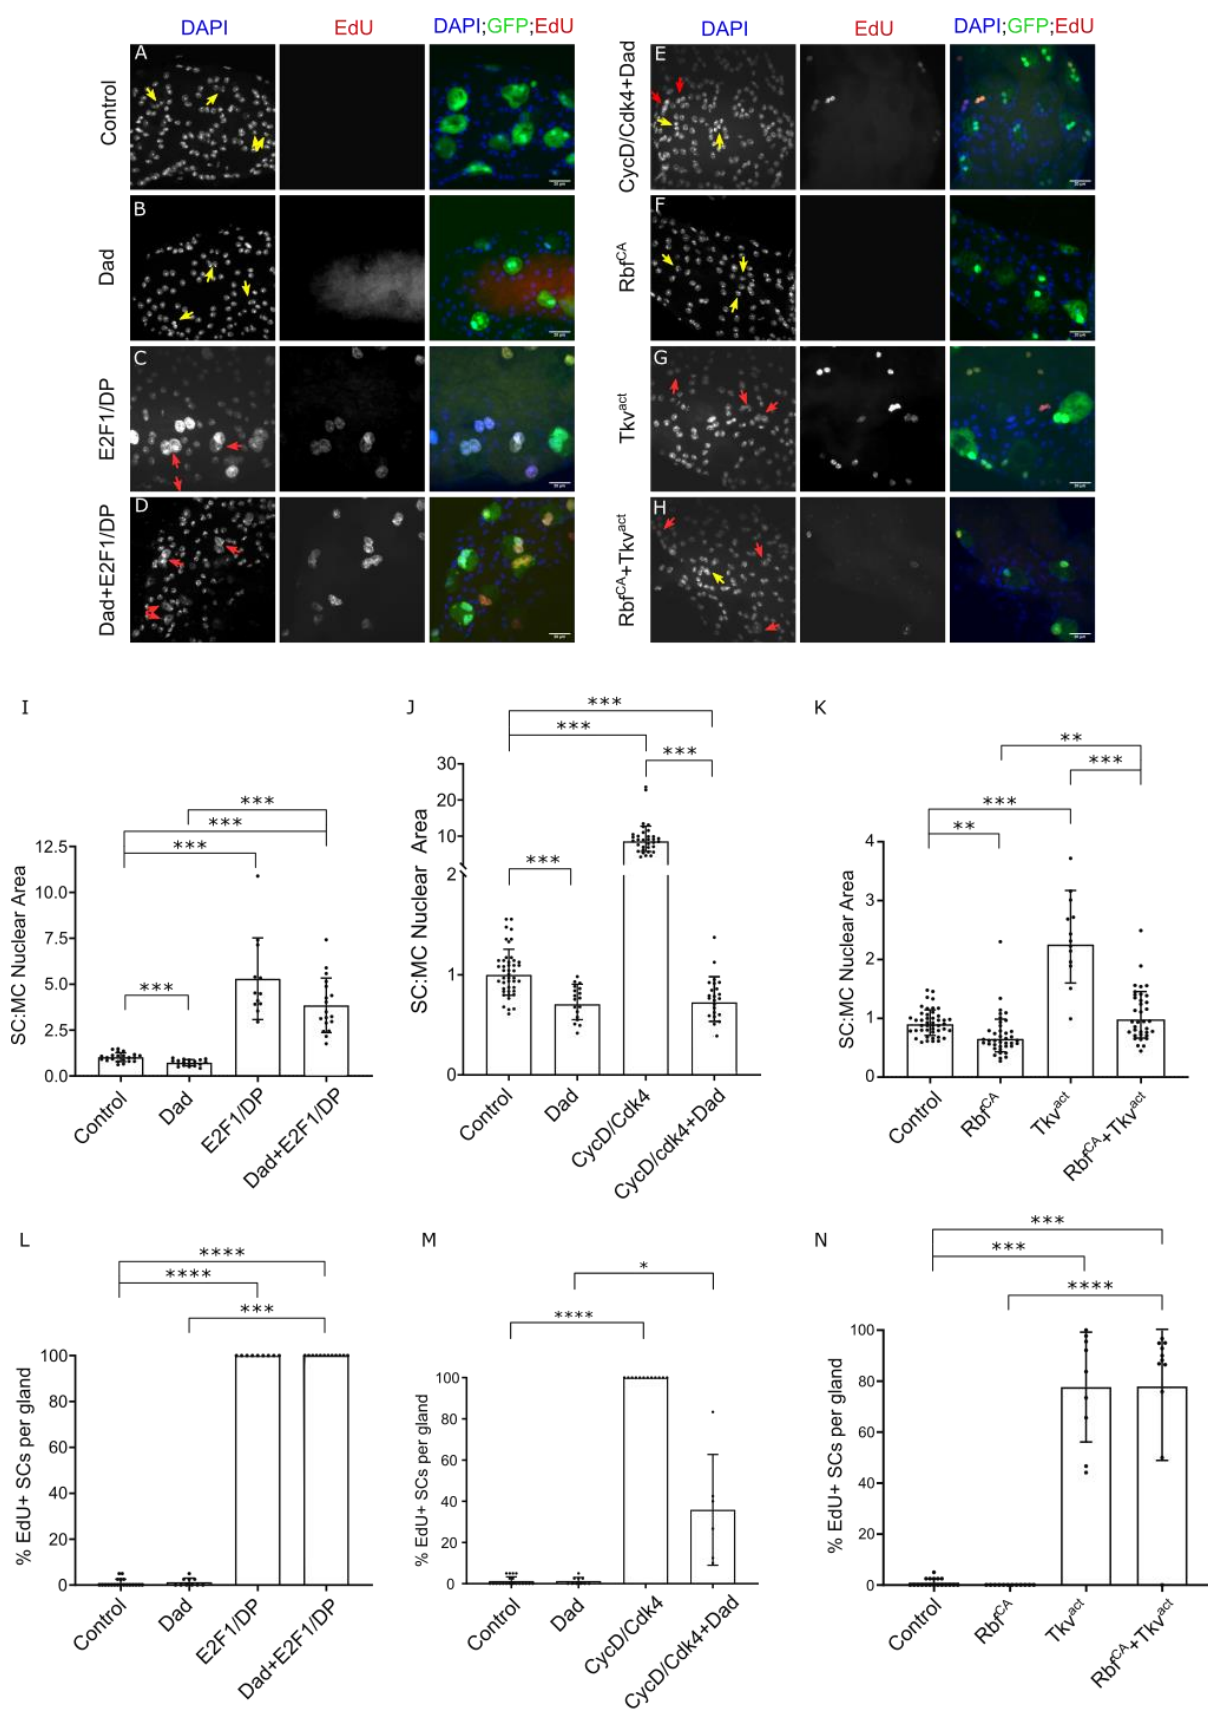

813 **Figure 5:**

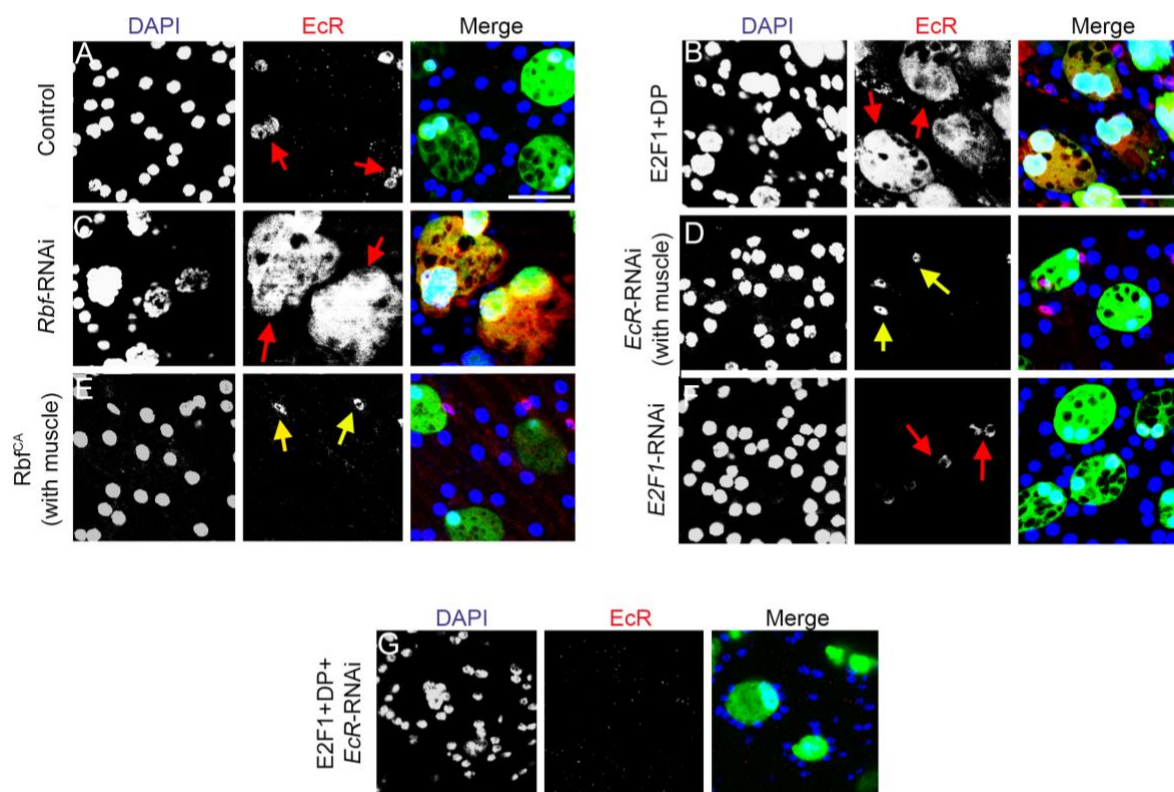

814

815

816

817

818

819

820

821

822

823

824

825 **Figure 6:**

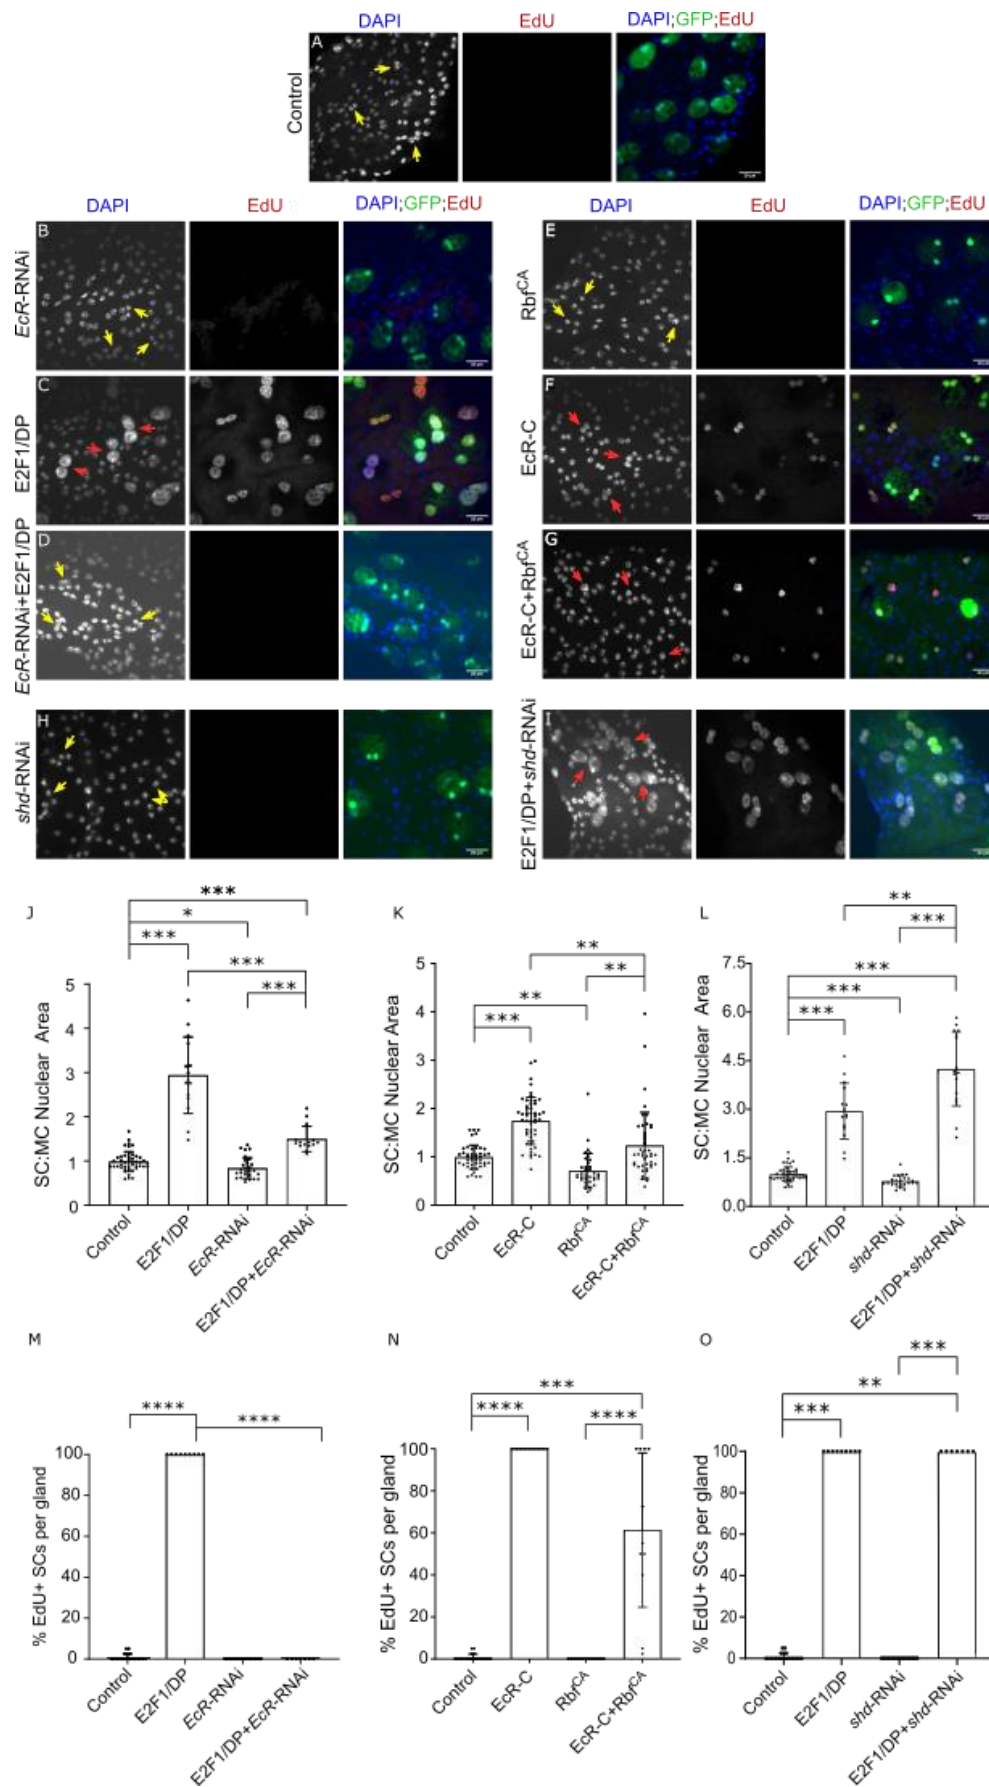

826 **Figure7**

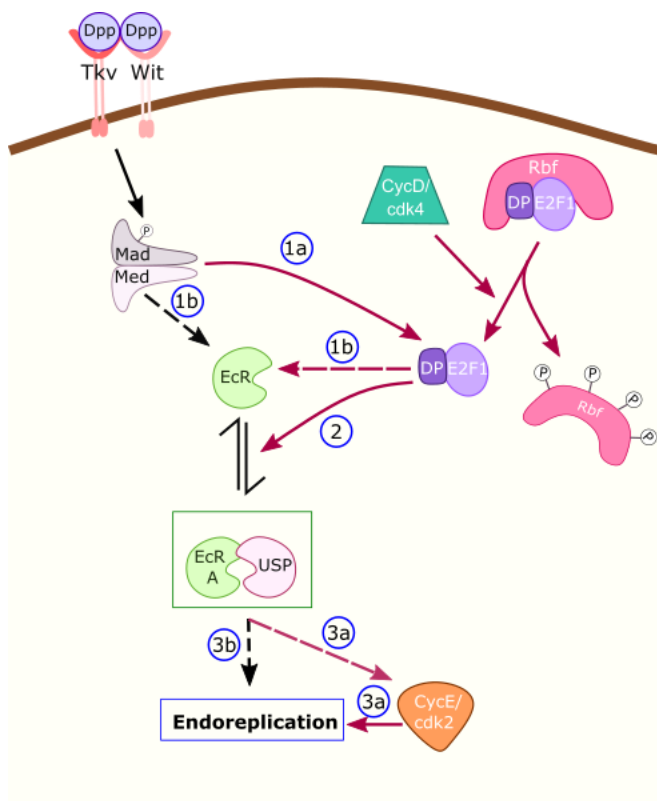

827

828

829

830

831

832

833

834

835

836

837

838

839



840 **Figure 8:**

Virgin Male

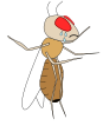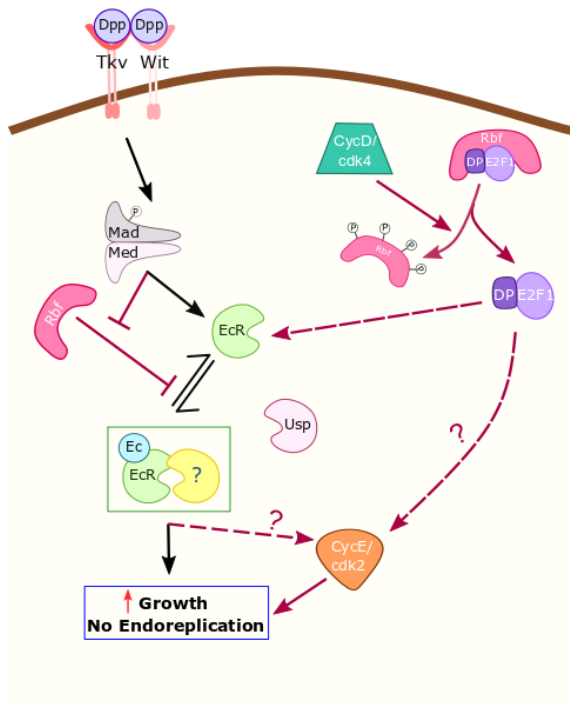

Mated Male

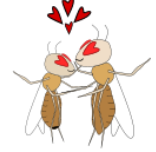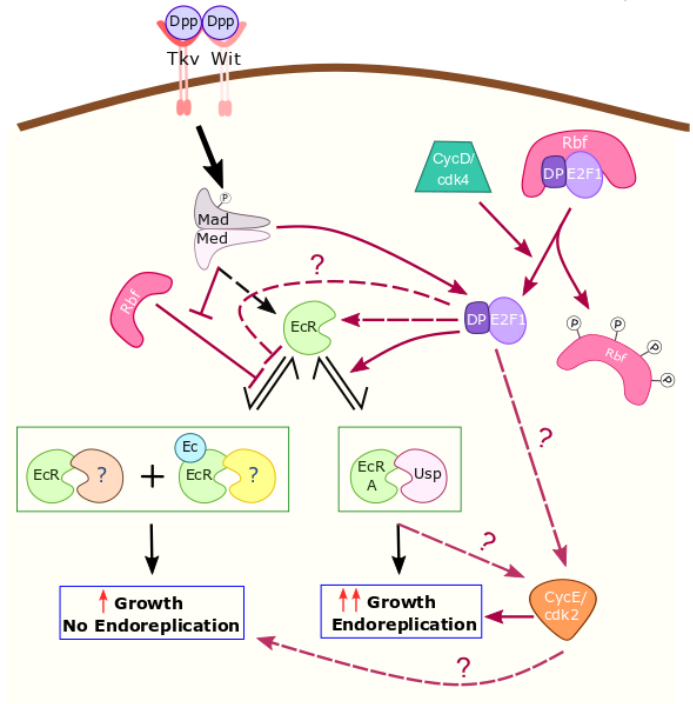

841
